# Supplementary material
Source: PubMed Central journal article supplement (PMC4259156)
Supplement: NIHMS603952-supplement-mmc2.pdf [file NIHMS603952-supplement-mmc2.pdf]

## Appendix 2

### Demonstration of the DSA Model Selection Process

In this demonstration, we apply the DSA procedure, `cvGLM()` –the model selection component of the `cvDSA` package for conditional means (e.g., treatment model)--using R software. Note that the DSA package can be used as an alternative to `cvGLM`. This demonstration illustrates the steps by which the DSA algorithm selects the same model that was used to simulate a given data distribution. We simulated data ( $n=2000$  observations, 4 variables  $x_1$ - $x_4$  from the random uniform distribution), and generated an underlying data distribution based on a simple model

$$Y = x_1 + x_2 + x_1x_3 + \varepsilon \quad (1)$$

where  $\varepsilon \sim \text{Normal}(0,0.25)$ . The following parameters were submitted to the `cvGLM()` procedure:

```
cvGLM( y=Y, x=X, family = 'gaussian', yx.model = list(Model = NULL,  
Order = (1, 1, 1, 1), Size = 4, Interaction = 2, ncv=2)
```

**Y** equals the vector of responses ( $y_1, \dots, y_n$ ) based on the simple model (1) given above; **X** represents the design matrix of the combined uniform random variables  $x_1$ - $x_3$ , as well as  $x_4$  which was not used in the data-generating model for **Y**; `family='gaussian'` indicates that the outcome variable **Y** is continuous and the error has a Gaussian distribution; `ncv = 2` indicates 2-fold cross-validation; and `'yx.model'` is a list object which consists of 4 elements:

- 1) `Model = NULL` indicates that the user expects the function to return the appropriate model that relates **y** and **X**. Alternatively, the user can supply a model, and the function will fit the coefficients.
- 2) `Order = c(1,1,1,1)` is a numerical vector that indicates that the power of each of

- the four variables in the model should not exceed 1;
- 3) Size = 4 specifies the maximal number of terms in the model;
  - 4) Interaction = 2 indicates the model only allows main terms and 2-way interactions.

The simulation model used to generate the data was

$$-1 + (1)x_1 + (1)x_2 + (1)x_1x_3$$

and the algorithm returned the estimated model

$$-1.014 + (0.991)x_1 + (1.023)x_2 + (1.002)x_1x_3$$

The cross-validation risk associated with this latter model (0.063) (see below) measures the discrepancy between the fit of the best size 3 model to the simulated data. Given the relative comparability of the estimates of the parameters to the true parameter values, it is clear that most of difference can be attributed to the random noise incorporated as part of the simulation and not the result of systematic error of DSA to identify the correct model. The steps used by the algorithm to generate models and select an optimal model of the data distribution (i.e., model used to simulate the data) have been extracted from output and provided below.

Depiction of the DSA model selection process as applied to simulated data in Appendix 2.

**Intercept**

Add { x1, x2, x3, x4 }

**Select x1**

Substitution { x1x2, x1x3, x1x4 }

**Select x1x2**

Substitution { x2, x2x3, x1x3, x2x4, x1x4, x1 }

Add x1x2 + { x1, x2, x3, x4, x2x3, x1x3, x2x4, x1x4 }

**Select x1x2 + x1x3**

Delete { x1x2, x1x3 }

Substitute x1x2 + { x3, x1x4, x2x3, x3x4, x1 }

x1x3 + { x2, x1x4, x2x3, x2x4, x1 }

Add x1x2 + x1x3 + { x1, x2, x3, x4, x1x4, x2x3, x3x4, x2x4 }

**Select x1x2 + x1x3 + x2**

Deletion x1x2 + x1x3, x1x2 + x2, x1x3 + x2

Substitute x1x2 + x1x3 + { x2x3, x2x4 }

x1x2 + x2 + { x1, x3, x2x3, x3x4, x1x4 }

x1x3 + x2 + { x1, x2x3, x2x4, x1x4 }

**Select x1 + x1x3 + x2**

Delete x1x3 + x2, x1 + x2, x1 + x1x3

Substitute x1 + x1x3 + { x1x2, x2x3, x2x4 }

x1 + x2 + { x3, x2x3, x1x2, x3x4, x1x4 }

x1x3 + x2 + { x1x2, x1x4 }

Add x1 + x1x3 + x2 + { x3, x4, x1x2, x2x3, x2x4, x3x4, x1x4 }

Select **x1 + x1x3 + x2 + x3x4**

**Selected model of size 3: x1 + x1x3 + x2.**

**Final Selected Model: -1.014 + 0.991\*x1+1.023\*x2+1.001\*x1x3 ( Cross-validation Risk 0.0629 )**
